# Supplementary material
Source: HighWire-hosted journal article supplement (https://bmjopen.bmj.com/content/12/9/e064226)
Supplement: inline-supplementary-material-1 [file inline-supplementary-material-1.pdf]

## Medline

- | #  | Searches                                                                                        |
|----|-------------------------------------------------------------------------------------------------|
| 1  | exp Brain Injuries/                                                                             |
| 2  | exp Stroke/                                                                                     |
| 3  | exp Stroke Rehabilitation/                                                                      |
| 4  | exp Brain Injuries, Traumatic/                                                                  |
| 5  | "brain injur*".mp.                                                                              |
| 6  | stroke*.mp.                                                                                     |
| 7  | CVA.mp.                                                                                         |
| 8  | TBI.mp.                                                                                         |
| 9  | "Head injur*".mp.                                                                               |
| 10 | "Brain trauma*".mp.                                                                             |
| 11 | "Head trauma*".mp.                                                                              |
| 12 | "Brain damage*".mp.                                                                             |
| 13 | "Cerebrovascular accident*".mp.                                                                 |
| 14 | "Cerebrovascular event*".mp.                                                                    |
| 15 | exp Craniocerebral Trauma/                                                                      |
| 16 | exp Head Injuries, Penetrating/                                                                 |
| 17 | ABI.mp.                                                                                         |
| 18 | "acquired brain injur*".mp.                                                                     |
| 19 | 1 or 2 or 3 or 4 or 5 or 6 or 7 or 8 or 9 or 10 or 11 or 12 or 13 or 14 or 15 or 16 or 17 or 18 |
| 20 | exp Community Participation/                                                                    |
| 21 | exp Community Integration/                                                                      |
| 22 | exp Social Participation/                                                                       |
| 23 | exp Social Adjustment/                                                                          |
| 24 | (communit* adj4 participat*).mp.                                                                |
| 25 | (communit* adj4 engagement).mp.                                                                 |
| 26 | (Participat* adj4 (leisure or activit* or aerobic or swimming or dancing or craft or recreatio: |
| 27 | "valued living".mp.                                                                             |
| 28 | "Communit* integrat*".mp.                                                                       |
| 29 | ((recreation* or leisure) adj (activit* or task* or program* or regime*)).mp.                   |
| 30 | "Accessing the community".mp.                                                                   |
| 31 | "Meaningful occupation*".mp.                                                                    |

- 32 "Human activit\*".mp.
- 33 "Valued activit\*".mp.
- 34 ((social\* or work\* or occupation\*) adj4 (participa\* or integrat\*)).mp.
- 35 "Social integrat\*".mp.
- 36 (Social adj2 connect\*).mp.
- 37 "community inclus\*".mp.
- 38 (life adj2 participat\*).mp.
- 39 (Recreation\* adj (activit\* or participa\* or pursuit\* or engage\* or access\*)).mp.
  
- 40 "social activit\*".mp.
  
- 41 "community rehabilitat\*".mp.
- 42 "meaningful activit\*".mp.
- 43 (meaningful adj (life or lives)).mp.
- 44 20 or 21 or 22 or 23 or 24 or 25 or 26 or 27 or 28 or 29 or 30 or 31 or 32 or 33 or 34 or 35 or
- 45 19 and 44
- 46 exp Qualitative Research/
- 47 exp Grounded Theory/
  
- 48 exp Focus Groups/
  
- 49 exp Self Report/
- 50 exp Interview/
- 51 exp Hermeneutics/
- 52 "Ethnographic Research".mp.
- 53 Qualitative\*.mp.
- 54 "Case stud\*".mp.
- 55 "Grounded theor\*".mp.
- 56 "narrative stud\*".mp.
- 57 "action research\*".mp.
- 58 "thematic analys\*".mp.
  
- 59 "narrative inquir\*".mp.
- 60 "focus group\*".mp.

- 61 Interview\*.mp.
- 62 "semi-structured interview\*" .mp.
- 63 46 or 47 or 48 or 49 or 50 or 51 or 52 or 53 or 54 or 55 or 56 or 57 or 58 or 59 or 60 or 61 or
- 64 45 and 63
- 65 limit 64 to yr="2014 -Current"
- 66 limit 65 to english language
