# Supplementary material
Source: HighWire-hosted journal article supplement (https://bmjopen.bmj.com/content/12/9/e064226)
Supplement: inline-supplementary-material-2 [file inline-supplementary-material-2.pdf]

**CINAHL**

- | #  | Searches                                                                            |
|----|-------------------------------------------------------------------------------------|
| 1  | (MH "Brain Injuries+")                                                              |
| 2  | (MH "Stroke+")                                                                      |
| 3  | "brain injur*"                                                                      |
| 4  | "stroke*"                                                                           |
| 5  | "CVA"                                                                               |
| 6  | "head injur*"                                                                       |
| 7  | "brain trauma*"                                                                     |
| 8  | "head trauma*"                                                                      |
| 9  | "brain damage*"                                                                     |
| 10 | "cerebrovascular accident*"                                                         |
| 11 | "cerebrovascular event*"                                                            |
| 12 | "craniocerebral trauma"                                                             |
| 13 | (MH "Head Injuries+")                                                               |
| 14 | "ABI"                                                                               |
| 15 | "acquired brain injur*"                                                             |
| 16 | "TBI"                                                                               |
| 17 | 1 or 2 or 3 or 4 or 5 or 6 or 7 or 8 or 9 or 10 or 11 or 12 or 13 or 14 or 15 or 16 |
| 18 | (MH "Social Participation")                                                         |
| 19 | (MH "Social Adjustment")                                                            |
| 20 | (communit* N4 participat*)                                                          |
| 21 | (communit* N4 engagement)                                                           |
| 22 | (Participat* N4 (leisure or activit* or aerobic or swimming or dancing or craft or  |
| 23 | "valued living"                                                                     |
| 24 | "Communit* integrat*"                                                               |
| 25 | ((recreation* or leisure) N0 (activit* or task* or program* or regime*))            |
| 26 | "Accessing the community"                                                           |
| 27 | "Meaningful occupation*"                                                            |
| 28 | "Human activit*"                                                                    |
| 29 | "Valued activit*"                                                                   |
| 30 | ((social* or work* or occupation*) N4 (participa* or integrat*))                    |
| 31 | "Social integrat*"                                                                  |

- 32 (Social N2 connect\*)
- 33 "community inclus\*"
- 34 (life N2 participat\*)
- 35 (Recreation\* N0 (activit\* or participa\* or pursuit\* or engage\* or access\*))
- 36 "social activit\*"
- 37 "community rehabilitat\*"
- 38 "meaningful activit\*"
- 39 (meaningful N0 (life or lives))  
S18 OR S19 OR S20 OR S21 OR S22 OR S23 OR S24 OR S25 OR S26 OR S27 OR S28 OR S  
40 OR S32 OR S33 OR S34 OR S35 OR S36 OR S37 OR S38 OR S39
- 41 S17 AND S40
- 42 (MH "Qualitative Studies+")
- 43 (MH "Grounded Theory")
- 44 (MH "Focus Groups")
- 45 (MH "Self Report+")
- 46 (MH "Interviews+")
- 47 "hermeneutics"
- 48 "Ethnographic Research"
- 49 "Qualitative\*"
- 50 "Case stud\*"
- 51 "Grounded theor\*"
- 52 "narrative stud\*"
- 53 "action research\*"
- 54 "thematic analys\*"
- 55 "narrative inquir\*"
- 56 "focus group\*"
- 57 "Interview\*"
- 58 (MH "Semi-Structured Interview")  
S42 OR S43 OR S44 OR S45 OR S46 OR S47 OR S48 OR S49 OR S50  
59 S52 OR S53 OR S54 OR S55 OR S56 OR S57 OR S58
- 60 S41 AND S59

**61 Limiters** - English Language; Published Date: 20140801-20211231
