# Supplementary material
Source: HighWire-hosted journal article supplement (https://bmjopen.bmj.com/content/12/9/e064226)
Supplement: inline-supplementary-material-3 [file inline-supplementary-material-3.pdf]

**SCOPUS**

| #  | Searches                                                                                   |
|----|--------------------------------------------------------------------------------------------|
| 1  | "brain injur*"                                                                             |
| 2  | stroke*                                                                                    |
| 3  | CVA                                                                                        |
| 4  | TBI                                                                                        |
| 5  | "Head injur*"                                                                              |
| 6  | "Brain trauma*"                                                                            |
| 7  | "Head trauma*"                                                                             |
| 8  | "Brain damage*"                                                                            |
| 9  | "Cerebrovascular accident*"                                                                |
| 10 | "Cerebrovascular event*"                                                                   |
| 11 | "Craniocerebral Trauma"                                                                    |
| 12 | ABI                                                                                        |
| 13 | "acquired brain injur*"                                                                    |
| 14 | 1 or 2 or 3 or 4 or 5 or 6 or 7 or 8 or 9 or 10 or 11 or 12 or 13                          |
| 15 | "Social Adjustment"                                                                        |
| 16 | (communit* W/3 participat*).mp.                                                            |
| 17 | (communit* W/4 engagement).mp.                                                             |
| 18 | (Participat* W/4 (leisure or activit* or aerobic or swimming or dancing or craft or recrea |
| 19 | "valued living".mp.                                                                        |
| 20 | "Communit* integrat*".mp.                                                                  |
| 21 | (recreation* or leisure) W (activit* or task* or program* or regime*).mp.                  |
| 22 | "Accessing the community".mp.                                                              |
| 23 | "Meaningful occupation*".mp.                                                               |
| 24 | "Human activit*".mp.                                                                       |
| 25 | "Valued activit*".mp.                                                                      |
| 26 | ((social* or work* or occupation*) W/4 (participa* or integrat*).mp.                       |
| 27 | "Social integrat*".mp.                                                                     |
| 28 | (Social W/2 connect*).mp.                                                                  |
| 29 | "community inclus*".mp.                                                                    |
| 30 | (life W/2 participat*).mp.                                                                 |
| 31 | (Recreation* W (activit* or participa* or pursuit* or engage* or access*).mp.              |

- 32 "social activit\*".mp.
- 33 "community rehabilitat\*".mp.
- 34 "meaningful activit\*".mp.
- 35 (meaningful W (life or lives)).mp.
- 36 "Self Report"
- 37
- 38 Hermeneutics
- 39 Qualitative\*.mp.
  
- 40 "Case stud\*".mp.
  
- 41 "Grounded theor\*".mp.
- 42 "narrative stud\*".mp.
- 43 "action research\*".mp.
- 44 "thematic analys\*".mp.
- 45 "narrative inquiry".mp.
- 46 "focus group\*".mp.
- 47 Interview\*.mp.
