# Supplementary material
Source: HighWire-hosted journal article supplement (https://bmjopen.bmj.com/content/12/9/e064226)
Supplement: inline-supplementary-material-4 [file inline-supplementary-material-4.pdf]

**EMBASE**

- | #  | Searches                                                                                   |
|----|--------------------------------------------------------------------------------------------|
| 1  | exp Brain Injuries/                                                                        |
| 2  | exp cerebrovascular accident/                                                              |
| 3  | exp Stroke Rehabilitation/                                                                 |
| 4  | exp traumatic brain injury/                                                                |
| 5  | "brain injur*".mp.                                                                         |
| 6  | stroke*.mp.                                                                                |
| 7  | CVA.mp.                                                                                    |
| 8  | TBI.mp.                                                                                    |
| 9  | "Head injur*".mp.                                                                          |
| 10 | "Brain trauma*".mp.                                                                        |
| 11 | "Head trauma*".mp.                                                                         |
| 12 | "Brain damage*".mp.                                                                        |
| 13 | "Cerebrovascular accident*".mp.                                                            |
| 14 | "Cerebrovascular event*".mp.                                                               |
| 15 | exp head injury/                                                                           |
| 16 | ABI.mp.                                                                                    |
| 17 | "acquired brain injur*".mp.                                                                |
| 18 | 1 or 2 or 3 or 4 or 5 or 6 or 7 or 8 or 9 or 10 or 11 or 12 or 13 or 14 or 15 or 16 or 17  |
| 19 | exp Community Participation/                                                               |
| 20 | exp Community Integration/                                                                 |
| 21 | exp Social Participation/                                                                  |
| 22 | exp social adaptation/                                                                     |
| 23 | (communit* adj4 participat*).mp.                                                           |
| 24 | (communit* adj4 engagement).mp.                                                            |
| 25 | (Participat* adj4 (leisure or activit* or aerobic or swimming or dancing or craft or recre |
| 26 | "valued living".mp.                                                                        |
| 27 | "Communit* integrat*".mp.                                                                  |
| 28 | ((recreation* or leisure) adj (activit* or task* or program* or regime*)).mp.              |
| 29 | "Accessing the community".mp.                                                              |
| 30 | "Meaningful occupation*".mp.                                                               |
| 31 | "Human activit*".mp.                                                                       |

- 32** "Valued activit\*".mp.
- 33** ((social\* or work\* or occupation\*) adj4 (participa\* or integrat\*)).mp.
- 34** "Social integrat\*".mp.
- 35** (Social adj2 connect\*).mp.
- 36** "community inclus\*".mp.
- 37** (life adj2 participat\*).mp.
- 38** (Recreation\* adj (activit\* or participa\* or pursuit\* or engage\* or access\*)).mp.
- 39** "social activit\*".mp.
- 40** "community rehabilitat\*".mp.
- 41** "meaningful activit\*".mp.
- 42** (meaningful adj (life or lives)).mp.
- 43** 20 or 21 or 22 or 23 or 24 or 25 or 26 or 27 or 28 or 29 or 30 or 31 or 32 or 33 or 34 or 35
- 44** 18 and 43
- 45** exp Qualitative Research/
- 46** exp Grounded Theory/
- 47** exp Self Report/
- 48** exp Interview/
- 49** exp Hermeneutics/
- 50** Qualitative\*.mp.
- 51** Case stud\*.mp.
- 52** Grounded theor\*.mp.
- 53** narrative stud\*.mp.
- 54** action research\*.mp.
- 55** thematic analys\*.mp.
- 56** narrative inquiry.mp.
- 57** focus group\*.mp.
- 58** Interview\*.mp.
- 59** 44 or 45 or 46 or 47 or 48 or 49 or 50 or 51 or 52 or 53 or 54 or 55 or 56 or 57 or 58
- 60** 44 and 59

**61** limit 60 to yr="2014 -Current"

**62** limit 61 to english language
