# Supplementary material
Source: HighWire-hosted journal article supplement (https://bmjopen.bmj.com/content/12/9/e064226)
Supplement: inline-supplementary-material-5 [file inline-supplementary-material-5.pdf]

**PSYCHINFO****#****Searches**

- 1 exp Brain Injuries/
- 2 exp Cerebrovascular Accidents/
- 3 exp Traumatic Brain Injury/
- 4 "brain injur\*".mp.
- 5 stroke\*.mp.
- 6 CVA.mp.
- 7 TBI.mp.
- 8 "Head injur\*".mp.
- 9 "Brain trauma\*".mp.
- 10 "Head trauma\*".mp.
- 11 "Brain damage\*".mp.
- 12 "Cerebrovascular accident\*".mp.
- 13 "Cerebrovascular event\*".mp.
- 14 "Craniocerebral Trauma".mp.
- 15 ABI.mp.
- 16 "acquired brain injur\*".mp.
- 17 1 or 2 or 3 or 4 or 5 or 6 or 7 or 8 or 9 or 10 or 11 or 12 or 13 or 14 or 15 or 16
- 18 exp Community Involvement/
- 19 exp Social Integration/
- 20 exp Social Adjustment/
- 21 (communit\* adj4 participat\*).mp.
- 22 (communit\* adj4 engagement).mp.
- 23 (Participat\* adj4 (leisure or activit\* or aerobic or swimming or dancing or craft or rec
- 24 "valued living".mp.
- 25 "Communit\* integrat\*".mp.
- 26 ((recreation\* or leisure) adj (activit\* or task\* or program\* or regime\*)).mp.
- 27 "Accessing the community".mp.
- 28 "Meaningful occupation\*".mp.
- 29 "Human activit\*".mp.
- 30 "Valued activit\*".mp.
- 31 ((social\* or work\* or occupation\*) adj4 (participa\* or integrat\*)).mp.

- 32 "Social integrat\*".mp.  
33 (Social adj2 connect\*).mp.  
34 "community inclus\*".mp.  
35 (life adj2 participat\*).mp.  
36 (Recreation\* adj (activit\* or participa\* or pursuit\* or engage\* or access\*)).mp.  
37 "social activit\*".mp.  
38 "community rehabilitat\*".mp.  
39 "meaningful activit\*".mp.
- 40 (meaningful adj (life or lives)).mp.  
20 or 21 or 22 or 23 or 24 or 25 or 26 or 27 or 28 or 29 or 30 or 31 or 32 or 33 or 34 o  
41 38 or 39 or 40  
42 17 and 41  
43 exp Qualitative Research/  
44 exp Grounded Theory/  
45 exp Focus Groups/  
46 exp Self Report/  
47 exp Interview/  
48 exp Hermeneutics/  
49 Qualitative\*.mp.  
50 Case stud\*.mp.  
51 Grounded theor\*.mp.  
52 narrative stud\*.mp.  
53 action research\*.mp.  
54 thematic analys\*.mp.  
55 narrative inquiry.mp.  
56 focus group\*.mp.  
57 Interview\*.mp.  
58 42 or 44 or 45 or 46 or 47 or 48 or 49 or 50 or 51 or 52 or 53 or 54 or 55 or 56 or 57 o  
59 42 and 58  
60 limit 59 to yr="2014 -Current"

**61** limit 60 to english language
